# Supplementary material for: Oxytocin Administration Alleviates Acute but Not Chronic Leptin Resistance of Diet-Induced Obese Mice
Source: Int J Mol Sci. 2018 Dec 26;20(1):88. doi: 10.3390/ijms20010088 (PMC6337181; doi:10.3390/ijms20010088)
Supplement: Supplementary file 1 [file ijms-20-00088-s001.pdf]

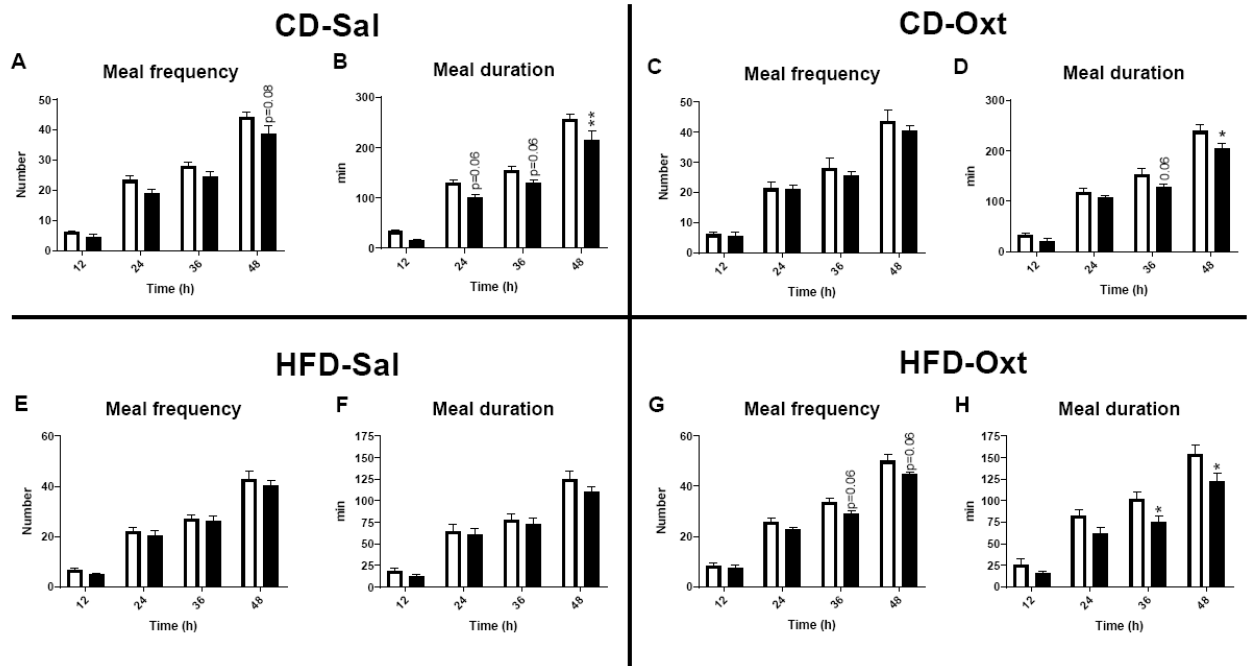

**Figure S1.** Acute leptin effects, meal analysis. (A, C, E, G) Meal frequency and (B, D, F, H) meal duration measurements of the acute leptin administration effect at the indicated timings. Statistical significance was analyzed by two way repeated measures ANOVA with a FDR Benjamini and Hochberg's post-hoc test. White bars, saline; black bars, leptin (1.5mg/Kg). n=7-8, \* p<0.05, \*\* p<0.01.

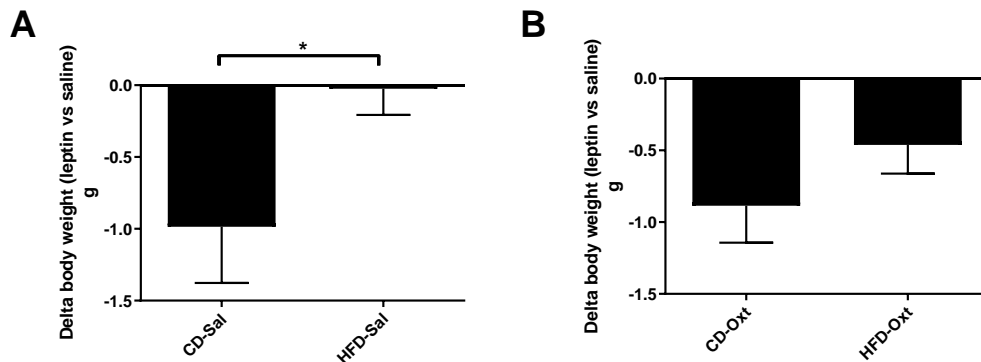

**Figure S2.** Acute leptin effects on body weight. (A-B) Body weight differences between 12 hours after the last IP injection of saline and 12 hours after the last IP injection of leptin in saline (A) and oxytocin (B)-treated mice. Statistical significance was analyzed by Student's *t* test. n=7-8, \* p<0.05.

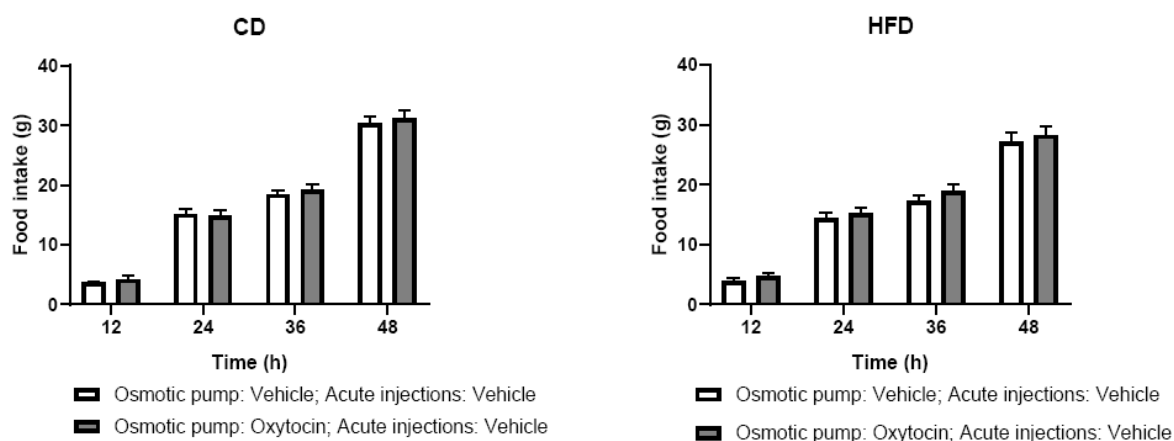

**Figure S3. Acute leptin effects, meal analysis.** Cumulative food intake at the indicated timings in the different groups. White bars, osmotic pumps delivering saline; grey bars, osmotic pumps delivering oxytocin (50 ug/day). Statistical significance was analyzed by two way repeated measures ANOVA with a FDR Benjamini and Hochberg's post-hoc test.

**Table S1.** Plasma measurements reflecting glucose (glycemia, insulinemia, HOMA-IR) and lipid (triglycerides, glycerol, non-esterified fatty acids and leptin) metabolism in HFD mice subcutaneously treated with minipumps infusing saline, oxytocin (50 ug/day), leptin (20 µg/day) or leptin plus oxytocin (50 ug/day and 20 µg/day) at the end of the treatment and following removal of food for 5 hours (10h-15h). Statistical significance was analyzed by one way ANOVA with a FDR Benjamini and Hochberg's post-hoc test. n=7-8.

|                  | Sal         | Oxt         | Lep 20      | Lep 20 + Oxt |
|------------------|-------------|-------------|-------------|--------------|
| TG (mg/mL)       | 0.52 ± 0.06 | 0.46 ± 0.05 | 0.54 ± 0.03 | 0.47 ± 0.03  |
| Glycerol (ug/mL) | 86.1 ± 6.7  | 86.6 ± 5.8  | 89.5 ± 9.0  | 89.5 ± 6.9   |
| NEFA (mM)        | 4.2 ± 0.3   | 4.5 ± 0.2   | 4.6 ± 0.2   | 5.0 ± 0.3    |
| Leptin (ng/mL)   | 19.1 ± 3.4  | 14.3 ± 2.1  | 25.4 ± 3.8  | 19.2 ± 2.6   |
| Glucose (mM)     | 9.3 ± 0.4   | 8.5 ± 0.4   | 8.6 ± 0.3   | 8.8 ± 0.3    |
| Insulin (mU/L)   | 38.9 ± 2.4  | 41.1 ± 4.5  | 32.4 ± 1.4  | 38.8 ± 6.4   |
| HOMA-IR          | 15.2 ± 1.7  | 14.5 ± 1.6  | 12.5 ± 0.8  | 15.4 ± 2.9   |

**Table S2.** Plasma measurements reflecting glucose (glycemia, insulinemia, HOMA-IR) and lipid (triglycerides, glycerol, non-esterified fatty acids and leptin) metabolism in HFD mice subcutaneously treated with minipumps infusing saline, oxytocin (50 ug/day), leptin (40 µg/day) or leptin plus oxytocin (50 ug/day and 40 µg/day) at the end of the treatment and following removal of food for 5 hours (10h-15h). Statistical significance was analyzed by one way ANOVA with a FDR Benjamini and Hochberg's post-hoc test. n=6-8. \*, p<0.05 Oxt vs Lep40 + Oxt; †, p<0.05 Oxt vs Lep40.

|                  | Sal         | Oxt                | Lep 40      | Lep 40 + Oxt |
|------------------|-------------|--------------------|-------------|--------------|
| TG (mg/mL)       | 0.88 ± 0.02 | 0.63 ± 0.02 (*)    | 0.97 ± 0.12 | 1.05 ± 0.14  |
| Glycerol (ug/mL) | 174 ± 4.6   | 145.3 ± 5.1 (*, †) | 186.8 ± 8.2 | 188.9 ± 12.1 |
| NEFA (mM)        | 4.1 ± 0.1   | 3.8 ± 0.4          | 4.9 ± 0.3   | 4.6 ± 0.2    |
| Leptin (ng/mL)   | 10.1 ± 1.4  | 11.9 ± 3.2         | 9.5 ± 1.7   | 10.4 ± 3.0   |
| Glucose (mM)     | 10.2 ± 0.2  | 9.0 ± 0.3          | 9.5 ± 0.5   | 9.2 ± 0.3    |
| Insulin (mU/L)   | 33.3 ± 3.7  | 30.7 ± 2.1         | 30.5 ± 2.5  | 29.8 ± 2.4   |
| HOMA-IR          | 14.8 ± 1.6  | 12.1 ± 1.1         | 12.8 ± 1.3  | 12.1 ± 1.0   |

**Table S3.** Mice basal characteristics. Plasma measurements in CD (chow diet) and HFD (high fat diet) fed mice at beginning of the treatments. Statistical significance was analyzed by Student's *t* test. n=8-15. \*\* p<0.01 ; \*\*\* p<0.001.

|                         | CD           | HFD                 |
|-------------------------|--------------|---------------------|
| Body weight (g)         | 30.88 ± 0.52 | 35.66 ± 0.90 (***)  |
| Fat content (g)         | 2.71 ± 0.16  | 9.70 ± 0.98 (***)   |
| Lean content (g)        | 25.04 ± 0.52 | 22.82 ± 0.39 (**)   |
| Glucose (fasting, mM)   | 7.96 ± 0.29  | 9.66 ± 0.25 (***)   |
| Insulin (fasting, mU/L) | 8.0 ± 0.7    | 34.9 ± 2.4 (***)    |
| HOMA-IR                 | 2.86 ± 0.34  | 15.01 ± 1.13 (***)  |
| Leptin (ng/mL)          | 0.73 ± 0.11  | 15.27 ± 2.33 (**)   |
| Glycerol (µg/mL)        | 28.76 ± 1.46 | 121.9 ± 12.03 (***) |
| Triglycerides (mg/mL)   | 0.83 ± 0.08  | 0.67 ± 0.06         |
| Free fatty acids (mM)   | 0.23 ± 0.02  | 4.366 ± 0.26 (***)  |
